# Supplementary material for: Emulsions stabilised by whey protein microgel particles: towards food-grade Pickering emulsions
Source: Royal Society of Chemistry journal article supplement (doi:10.1039/c4sm00179f), 2014-01-01
Supplement: c4sm00179f1.pdf [file c4sm00179f1.pdf]

## EMULSIONS STABILISED BY WHEY PROTEIN MICROGEL PARTICLES: TOWARDS FOOD-GRADE PICKERING EMULSIONS

Mathieu Destribats,<sup>a,†</sup> Martine Rouvet,<sup>b</sup> Cécile Gehin-Delval,<sup>b</sup> Christophe Schmitt<sup>b</sup> and

Bernard P. Binks<sup>a,\*</sup>

<sup>a</sup> *Surfactant & Colloid Group, Department of Chemistry, University of Hull,  
Hull. HU6 7RX. UK*

<sup>b</sup> *Department of Food Science and Technology, Nestlé Research Center, Vers-chez-les-Blanc,  
P.O. Box 44, CH-1000 Lausanne 26, Switzerland*

<sup>†</sup> *Currently at L'ORÉAL, 11-13 rue Dora Maar, 92400 Saint-Ouen, France*

### Electronic Supporting Information

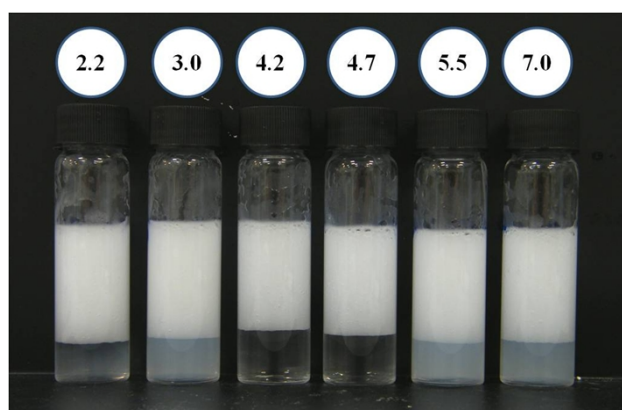

**Figure S1.** Photograph of vessels containing heptane-in-water emulsions (1:1) stabilized by 0.1 wt.% WPM as a function of pH (given) taken 1 hr. after emulsion preparation.

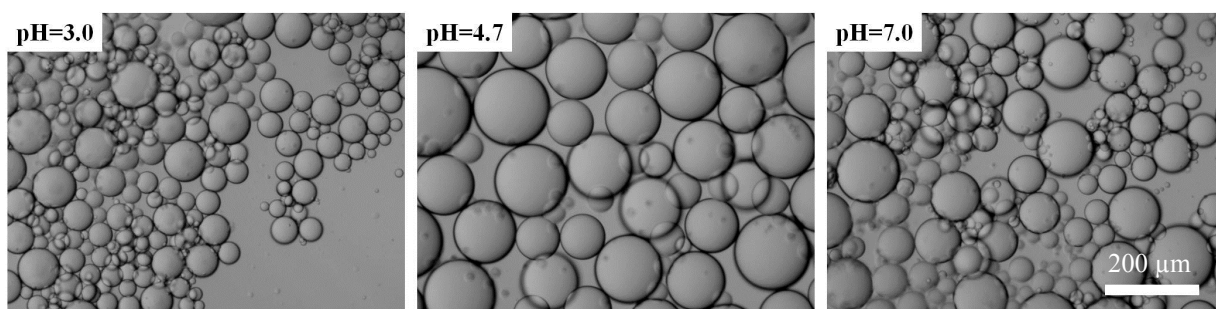

**Figure S2.** Optical microscopy images of emulsions in Figure S1.
